# Supplementary material
Source: publisher figshare collection journal article supplement (https://karger.figshare.com/articles/dataset/_/7257263)

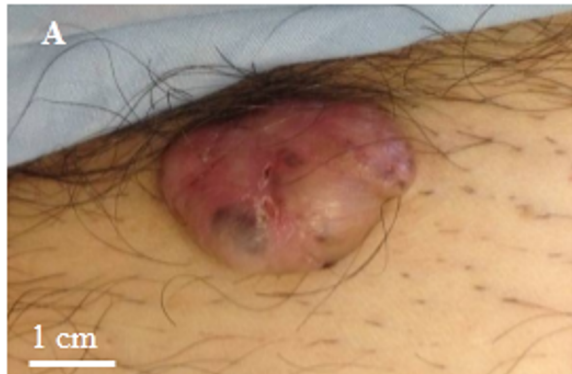

**B**  $c.573C>G$  (p.Y191X)

II2  
Heterozygous  
(C/G)

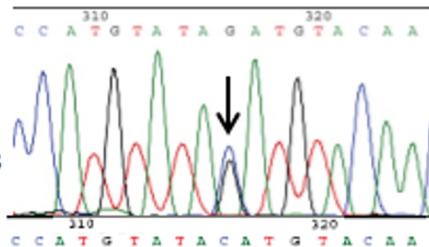

III1  
Wild Type  
(C/C)

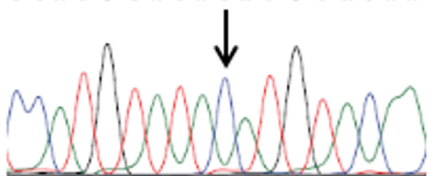

Supplement: Supplementary file 1 [file 1]
